1 **Single-cell multiomics sequencing reveals the functional regulatory landscape of**  
2 **early embryos**

3 Yang Wang<sup>1,2,3,5</sup>, Peng Yuan<sup>1,2,3,5</sup>, Zhiqiang Yan<sup>1,2,3,4,5</sup>, Ming Yang<sup>1,2,3</sup>, Ying Huo<sup>1,2,3</sup>, Yanli Nie<sup>1,2,3</sup>,  
4 Xiaohui Zhu<sup>1,2,3</sup>, Liying Yan<sup>1,2,3,\*</sup>, Jie Qiao<sup>1,2,3,4,\*</sup>

5 1 Beijing Advanced Innovation Center for Genomics, Center for Reproductive Medicine,  
6 Department of Obstetrics and Gynecology, Peking University Third Hospital, Beijing 100191,  
7 China;

8 2 Key Laboratory of Assisted Reproduction, Ministry of Education, Beijing 100191, China

9 3 Beijing Key Laboratory of Reproductive Endocrinology and Assisted Reproductive Technology,  
10 Beijing 100191, China

11 4 Peking-Tsinghua Center for Life Sciences, Peking University, Beijing 100871, China

12 5 These authors contributed equally.

13

14 Correspondence should be addressed to: L.Y. ([yanliyingkind@aliyun.com](mailto:yanliyingkind@aliyun.com)) or J.Q.  
15 ([jie.qiao@263.net](mailto:jie.qiao@263.net))

16

## 17 **Abstract**

18 Extensive epigenetic reprogramming occurs during preimplantation embryo development and is  
19 accompanied by zygotic genome activation (ZGA) and first cell fate specification. Recent studies  
20 using single-cell epigenome sequencing techniques have provided global views of the dynamics of  
21 different epigenetic layers during this period. However, it remains largely unclear how the drastic  
22 epigenetic reprogramming contributes to transcriptional regulatory network. Here, we developed a  
23 single-cell multiomics sequencing technology (scNOMeRe-seq) that enables profiling of genome-  
24 wide chromatin accessibility, DNA methylation and RNA expression in the same individual cell  
25 with improved performance compared to that of earlier techniques. We applied this method to  
26 analyze the global dynamics of different molecular layers and their associations in mouse  
27 preimplantation embryos. We found that global DNA methylation remodeling facilitates the  
28 reconstruction of genetic lineages in early embryos and revealed that the gradual increases in  
29 heterogeneity among blastomeres are driven by asymmetric cleavage. Allele-specific DNA  
30 methylation pattern is maintained throughout preimplantation development and is accompanied by  
31 allele-specific associations between DNA methylation and gene expression in the gene body that  
32 are inherited from oocytes and sperm. Through integrated analyses of the collective dynamics  
33 between gene expression and chromatin accessibility, we constructed a ZGA-associated regulatory  
34 network and revealed coordination among multiple epigenetic layers, transcription factors (TFs)  
35 and repeat elements that instruct the proper ZGA process. Moreover, we found that inner cell mass  
36 (ICM)/trophectoderm (TE) lineage-associated cis-regulatory elements are stepwise activated in  
37 blastomeres during post-ZGA embryo stages. TE lineage-specific TFs play dual roles in promoting  
38 the TE program while repressing the ICM program, thereby separating the TE lineage from the ICM  
39 lineage. Taken together, our findings not only depict the first single-cell triple-omics map of  
40 chromatin accessibility, DNA methylation and RNA expression during mouse preimplantation  
41 development but also enhance the fundamental understanding of epigenetic regulation in early  
42 embryos.

43

## 44 **Introduction**

45 In mammals, embryo development starts from a unified zygote. Coincident with the first several  
46 zygotic cleavages, early embryos activate the zygotic genome, restore totipotency and further  
47 generate the inner cell mass (ICM) and trophectoderm (TE) during preimplantation development<sup>1-</sup>  
48 <sup>3</sup>. Failures in zygotic genome activation (ZGA) or ICM/TE lineage specification can cause early  
49 embryo developmental arrest and implantation failure in both mice and humans. With advances in  
50 low-input and single-cell epigenome sequencing, recent studies have revealed that extensive global  
51 epigenetic reprogramming, for instance, reprogramming of DNA methylation (Met), chromatin  
52 accessibility (Acc) and histone modifications, occurs in early embryos during this period<sup>4-14</sup>.  
53 However, it remains to be explored how these epigenome reconfigurations contribute to the  
54 establishment of proper regulatory networks of early embryos.

55 Acc is a hallmark of cis-regulatory elements (CREs), such as promoters and enhancers, that act  
56 coordinately with transcription factors (TFs) and epigenetic modifications to finely regulate the  
57 transcriptional activity of downstream genes and establish cell-type specific regulatory networks<sup>15,16</sup>.  
58 The currently optimized low-input open-chromatin sequencing techniques, such as the assay for  
59 transposase-accessible chromatin using sequencing (ATAC-seq) and low-input DNase I sequencing  
60 (liDNase-seq), are able to detect genome-wide dynamics of Acc in early embryos. However, the  
61 signal of the open regions reflects the average signal of the mixed sample, which may be confounded  
62 by highly heterogeneous and asynchronized blastomeres and even abnormal embryos<sup>6,10,17,18</sup>.  
63 Single-cell ATAC-seq detects only thousands of informative reads per cell on average, which might  
64 limit its application with the scarce resources of early embryos<sup>19-21</sup>. Moreover, because of the high  
65 heterogeneity of early blastomeres, a functional understanding of epigenomic changes requires  
66 knowledge of the transcriptional output from one individual cell. Recently, different single-cell  
67 epigenome sequencing methods and transcriptome sequencing methods have been combined to  
68 profile different combinations of molecular layers from the same individual cell, providing  
69 opportunities to explore the associations between different molecular layers<sup>22-26</sup>. However, factors  
70 compromising the quality of data from current single cell multi-omics technologies, such as poor  
71 genome coverage or low gene number detection, might constrain the precise interpretation of the

72 associations between different molecular layers.

73 Here, we describe a technique called **single-cell nucleosome occupancy, methylome and RNA**  
74 **expression sequencing** (scNOMeRe-seq) that effectively combines single-cell nucleosome  
75 occupancy and methylome sequencing (scNOMe-seq) with Multiple Annealing and dC-Tailing-  
76 based Quantitative single-cell RNA sequencing (MATQ-seq), showing improved performance for  
77 profiling of multiple molecular layers from the same individual cell<sup>4,27,28</sup>. We applied scNOMeRe-  
78 seq to analyze genome-wide Acc, Met and RNA expression (Expr) in mouse preimplantation  
79 embryos at single-cell resolution and to provide a comprehensive overview of the functional  
80 regulatory landscape in early embryos.

81

## 82 RESULTS

### 83 scNOMeRe-seq profiles in mouse preimplantation embryos.

84 To simultaneously detect genome-wide Acc, Met and Expr in the same individual cell, we  
85 developed a single-cell multiomic sequencing method, scNOMeRe-seq, by combining scNOMe-  
86 seq and MATQ-seq (Fig. 1a). We employed this method to profile 233 single cells isolated from  
87 mouse preimplantation embryos at different stages with RNA data from 221 (94.8%) single cells  
88 and DNA data from 218 (93.4%) single cells passed our stringent criteria, showing a high success  
89 rate (Extended Data Fig. 1a, f and g; Supplementary Table 1). The DNA data showed better genome  
90 coverages than those in a previous study using single-cell chromatin overall omic-scale landscape  
91 sequencing (scCOOL-seq) (this study: WCG 3.49 million, 15.8%, GCH 31.0 million, 15.5% on  
92 average per cell; scCOOL-seq: WCG 2.24 million, 10.1%, GCH 19.7 million, 9.8% on average per  
93 cell)<sup>4</sup>. The RNA dataset showed high accuracy, high reproducibility, even coverage through genic  
94 regions, and high detection sensitivity for genes expressed at low levels (Extended Data Fig. 1b-  
95 e)<sup>29</sup>. More importantly, our RNA dataset could faithfully distinguish between ICM and TE cells in  
96 embryonic day (E) 3.5 blastocysts (Extended Data Fig. 1h-i), further confirming the high quality of  
97 our RNA data obtained from scNOMeRe-seq.

98 To detect the abnormal blastomeres in our early embryos, we analyzed the copy number variations  
99 (CNVs) with the RNA data and DNA data for each individual cell. Consistent results were obtained  
100 from both datasets regarding the inferred CNVs, even for the partial chromosome CNVs (Fig. 1b  
101 and Extended Data Fig. 2a). Unexpectedly, we also found several parthenogenetic (PG) embryos  
102 among our detected early embryos using single-nucleotide polymorphism (SNP)-separated allelic  
103 reads (Fig. 1c and Extended Data Fig. 2a). Then, we sought to determine whether the embryo  
104 abnormalities would cause aberrant embryo development. Notably, along the developmental  
105 trajectory inferred from the RNA dataset, most PG blastomeres showed delayed development after  
106 ZGA compared to that of normal and aneuploid blastomeres (Extended Data Fig. 2b-c). Although  
107 only 58% of ZGA genes were activated in PG blastomeres at the 2-cell stage, the PG blastomeres  
108 became more similar to the rest of the blastomeres beginning at the same stage after ZGA, indicating  
109 that the PG embryos were able to go through at least partial ZGA and develop to further stages

110 (Extended Data Fig. 2b and d). The Met in PG blastomeres were clearly distinct from that in normal  
111 and aneuploid blastomeres, while Acc did not differ among PG, normal and aneuploid blastomeres  
112 (Extended Data Fig. 2f-g and 3a). Together, these results revealed that the aneuploid cells were able  
113 to undergo preimplantation development as well as proper epigenetic reprogramming; however, the  
114 PG cells showed delayed development and an aberrant Met pattern.

115 Furthermore, k-means clustering with the Acc of the transcription start site (TSS) could not  
116 distinguish the abnormal cells from the normal cells; however, the cells from the two clusters  
117 showed significant differences in global Acc levels and correlations between Acc and Expr at the  
118 TSS regions for each stage (Extended Data Fig. 3b). Notably, the cells from the cluster with the  
119 relatively higher Acc level (cluster\_2) consistently showed lower correlations between Acc and  
120 Expr at the TSS regions, without differences in global Met levels, and correlations between Met and  
121 Expr were observed between the two clusters (Extended Data Fig. 3b). A previous study revealed  
122 globally increased Acc at S phase during mitosis; such changes in Acc are not associated with  
123 transcriptional regulation but are potentially linked to DNA duplication<sup>30</sup>. Therefore, these two  
124 clusters in each stage reflected the highly asynchronous cell cycles among the blastomeres of the  
125 early embryos. Furthermore, we detected the nucleosome-depleted regions (NDRs) using an  
126 aggregated Acc dataset from single cells in each cluster at each stage. Regardless of the genome  
127 coverage, cluster\_1 (low Acc level and high correlation between Acc and Expr) exhibited more  
128 NDRs than cluster\_2 for each stage (Extended Data Fig. 3c-d). The NDRs in cluster\_1 at each stage  
129 showed greater fractions overlapping with previously defined open chromatin in early embryos than  
130 those in cluster\_2 (Extended Data Fig. 3e-f)<sup>4,6,10</sup>. Together, these results reveal that the  
131 heterogeneity of Acc among blastomeres of the same stage might mainly derive from highly  
132 asynchronous blastomere cell cycles and suggest that the mixed asynchronous populations may  
133 increase the background noise and compromise the discovery of transcription-related Acc signals.

134 To focus on transcriptional regulation-related epigenome characteristics during preimplantation  
135 development, the Acc datasets of cells from cluster\_2 and the Met datasets of PG cells were removed  
136 for downstream analysis. Then, we explored the dynamics and associations of different molecular  
137 layers in each single cell during preimplantation development. Both unsupervised clustering and

138 principal component analysis (PCA) revealed that cells of the same stage clustered more closely  
139 within each molecular layer, consistent with the findings of previous studie (Fig. 1d)<sup>4</sup>. The global  
140 Met levels were relatively stable in earlier stages but sharply decreased at the blastocyst stage (Fig.  
141 1e, Extended Data Fig. 2e). The correlations between Met and Expr in the TSS and gene body  
142 regions showed the highest associations in zygotes and gradually decreased in the following stages  
143 (Fig. 1e). In contrast, global Acc was drastically decreased at the 2-cell stage and restored at the 4-  
144 cell stage before gradually increasing at later stages (Fig. 1f, Extended Data Fig. 2e ). Notably, the  
145 correlations between Acc and Expr at the TSS regions were the most positive at the 2-cell stage  
146 among all preimplantation stages, coinciding with ZGA; this finding suggests that the drastic Acc  
147 reprogramming at the 2-cell stage might contribute to proper ZGA (Fig. 1f).

#### 148 **Reconstruction of genetic lineages reveals the source of heterogeneity in early embryos**

149 Given the insufficient maintenance of Met levels during mitosis in early embryos, a previous study  
150 sought to reconstruct the genetic lineages of 4-cell embryos using single-cell genome-wide CpG  
151 Met datasets in both humans and mice and successfully elucidated the lineages<sup>5</sup>. To test whether our  
152 single-cell Met (WCG) datasets could be used to infer the genetic lineages of early embryos, we  
153 first computed the pairwise correlations among blastomeres in each individual 4-cell or late 4-cell  
154 embryo (see Methods). We repeatedly observed two pairs of cells with highly negatively correlated  
155 Met levels in each individual embryo, consistent with previous findings (Fig. 2a, b and d)<sup>5</sup>. Then,  
156 we validated that the two cells in each pair originated from the same mother 2-cell blastomere (Fig.  
157 2e). Interestingly, we also observed a conserved pairwise correlation of Met levels among  
158 blastomeres for each analyzed 8-cell embryo, implying that it might be possible to reconstruct  
159 genetic lineages for 8-cell embryos using single-cell Met datasets (Fig. 2c and d). To verify the Met  
160 correlation patterns among blastomeres at the 8-cell stage derived from the same blastomeres in 2-  
161 cell and 4-cell embryos, we microinjected FITC to label one blastomere each in 2-cell and 4-cell  
162 embryos and performed single-cell bisulfite sequencing (scBS-seq) for each individual cell when  
163 these embryos developed to the 8-cell stage. Blastomeres in 8-cell embryos derived from the same  
164 blastomeres in 4-cell embryos exhibited highly positively correlated Met levels; in contrast, 2 pairs  
165 of blastomeres in 8-cell embryos derived from the same blastomeres in 2-cell embryos exhibited

166 highly positively correlated Met levels within pairs, but cells from different pairs exhibited highly  
167 negatively correlated Met levels (Fig. 2f-g). Therefore, these results demonstrate that we can  
168 accurately construct the full lineages from the zygote stage to the 8-cell embryo stage using single-  
169 cell Met datasets.

170 Furthermore, we investigated when unified zygotes generate heterogeneity in different molecular  
171 layers among blastomeres. We first computed the correlations between blastomeres within each  
172 embryo (intraembryonic correlations) versus those between blastomeres from different embryos  
173 (interembryonic correlations) at the same stage for each molecular layer. We found that the  
174 intraembryonic correlations were consistently higher than the interembryonic correlations for each  
175 molecular layer throughout the preimplantation development stages, suggesting highly  
176 asynchronous development among different embryos at the same stage (Fig. 2h). Moreover, the  
177 correlations in Expr levels were highest at the zygote stage and gradually decreased at later stages,  
178 suggesting that the heterogeneity among blastomeres in the same embryo was generated during  
179 ZGA and gradually increased with preimplantation development (Fig. 2h). We also noticed that the  
180 correlations in both the Met and Acc levels were highest at the 2-cell stage, indicating that the  
181 epigenome was robustly reprogrammed for each individual cell during ZGA (Fig. 2h). Leveraging  
182 this lineage tracing information, we further explored the dynamics of heterogeneity between  
183 daughter cells during the first three cleavages. In the transcriptome, the correlations between  
184 blastomeres from the same mother cells gradually decreased during the first three cleavages,  
185 whereas the correlations between blastomeres from the same mother cells at the late 4-cell stage  
186 were comparable to those at the 4-cell stage (Fig. 2h). Moreover, the correlations between  
187 blastomeres from the same grandmother cells were higher than those of blastomeres from different  
188 grandmother cells in 8-cell embryos (Fig. 2h). These results demonstrated that asymmetric cleavage  
189 might have been the major source of the transcriptome heterogeneity. Although the heterogeneity in  
190 the epigenome seemed not to be associated with asymmetric cleavage, we notably observed that the  
191 correlations in Met levels between blastomeres from the same mother cells were higher in 8-cell  
192 embryos than in 4-cell and late 4-cell embryos, indicating that increased Met maintenance occurs  
193 to some extent during DNA duplication at the 4-cell stage (Fig. 2h).



## 194 **Allele-specific regulation of gene expression in early embryos**

195 Drastic epigenetic reprogramming occurs in parental genomes after fertilization. The Acc levels of  
196 the parental genomes were comparable in most individual cells throughout preimplantation  
197 development (Fig. 3a). The Met level in the paternal allele was consistently higher than that in the  
198 maternal allele for each individual zygote (Fig. 3b). From the 2-cell to the 8-cell stage, the global  
199 differences in Met levels between parental alleles varied in the different individual cells; however,  
200 after the morula stage, the Met level in the maternal allele was consistently higher than that in the  
201 paternal allele for each individual cell (Fig. 3b). In addition, we found that 16.7%-29.7% of regions  
202 showed significant allelic differences ( $FDR < 0.01$ ) in Acc levels, and 7.9%-40.2% of regions  
203 showed significant allelic differences ( $FDR < 0.01$ ) in Met levels across preimplantation stages  
204 (Extended Data Fig. 4a-b). The differences in allelic Acc levels were widely distributed in the whole  
205 genome and showed no preference for a particular parental allele (Fig. 3c, Extended Data Fig. 4c).  
206 Notably, the maternal hypermethylated regions were highly enriched in genic regions, whereas the  
207 paternal hypermethylated regions were highly enriched in distal intergenic regions throughout the  
208 preimplantation stages, consistent with previous findings (Fig. 3d, Extended Data Fig. 4d)<sup>4</sup>. Given  
209 that the oocyte genome is highly methylated at actively transcribed genic regions and  
210 hypomethylated at intergenic regions, while the sperm genome is highly methylated at intergenic  
211 regions, our results indicate that global differences in Met levels between parental alleles in gametes  
212 could be largely maintained throughout preimplantation development<sup>4,12</sup>.

213 We next sought to determine whether the allelic epigenome differences were associated with allelic  
214 transcriptional regulation. First, we overlapped the differential allelic epigenetic regions with known  
215 imprinting control regions (ICRs)<sup>31</sup>. Four germline ICRs overlapped with our differential allelic Acc  
216 regions, and all showed corresponding differential allelic Acc patterns in at least one  
217 preimplantation stage (Extended Data Fig. 4e). In the other hand, six known germline ICRs  
218 overlapping with differential allelic Met regions showed the expected differential allelic Met  
219 patterns throughout preimplantation development, validating the accuracy of our analysis (Extended  
220 Data Fig. 4f). Furthermore, we assessed the correlations between allelic epigenetic modification  
221 levels and Expr in each individual cell. Both parental alleles showed similar correlation patterns

222 between allelic Acc and Expr, mimicking the overall Acc vs Expr associations (Fig. 3e). Notably,  
223 we observed clearly different correlation patterns between allelic Met and Expr in parental alleles:  
224 the Met levels of the paternal genome at the gene body regions showed no correlations with Expr,  
225 unlike those in the maternal genome (Fig. 3f). To determine whether the allele-specific correlations  
226 between Met and Expr at gene bodies were caused by inherent correlations from maternal factors,  
227 we further compared the correlations between allelic Met and the Expr of maternal genes (transcript  
228 per million mapped reads (TPM)  $\geq 1$  in the zygote) with nonmaternal genes. The Met levels at gene  
229 body regions were clearly higher for maternal genes than for nonmaternal genes in maternal alleles  
230 throughout preimplantation stages (Fig. 3g). As expected, major Met differences between parental  
231 alleles were observed in maternal genes but not in nonmaternal genes (Fig. 3g). Furthermore, we  
232 found that the correlations between maternal Met and Expr at gene body regions were clearly weaker  
233 in nonmaternal genes than in maternal genes, indicating that the observed positive correlations  
234 between maternal Met and Expr at gene body regions were mainly inherited from oocytes (Fig. 3h).

### 235 **scNOMeRe-seq reveals a ZGA-associated regulome**

236 To reveal ZGA-associated CREs, we measured the correlations between the Acc of each  
237 promoter/distal NDR and the Expr of its corresponding ZGA gene (2-cell vs zygote, fold change  $\geq$   
238 4, FDR  $< 0.01$ ; Supplementary Table 2) across single cells during the transition from the zygote to  
239 the 2-cell stage. We found that 338 promoter NDRs and 7822 distal NDRs were positively linked to  
240 301 and 2239 ZGA genes, respectively, while 356 promoter NDRs and 2728 distal NDRs were  
241 negatively linked to 317 and 1226 ZGA genes, respectively (Fig. 4a-b; Supplementary Table 3).  
242 Although the Met in those CREs was not significantly associated with ZGA gene expression (data  
243 not shown), the overall Met levels of these positively correlated CREs were lower in 2-cell embryos  
244 than in zygotes (Extended Data Fig. 5a and c). Notably, the Acc of these positively correlated CREs  
245 was specifically increased in each individual cell in 2-cell embryos, but this increase was  
246 accompanied by a drastic global Acc decrease during this period (Extended Data Fig. 5b and d).  
247 These results suggest that robust chromatin reprogramming occurs during ZGA to remove  
248 regulatory memory from gametes and rebuild the zygotic regulatory network.

249 To explore how ZGA is regulated in early embryos, we further comprehensively analyzed the

250 enrichment of repeat elements and histone modifications in ZGA-associated CREs. The positively  
251 correlated CREs, but not the negatively correlated CREs, were preferentially enriched with Alu, B2,  
252 B4 and ERVL repeat classes as well as active histone modifications (H3K4me3 and H3K27ac) in  
253 both promoter and distal regions (Fig. 4c-d). H3K4me3 was gradually established at the majority of  
254 positively correlated CRE loci from the MII oocyte stage to the 2-cell stage and was colocalized  
255 with H3K27ac in both promoter and distal regions, while repressive histone modifications  
256 (H3K27me3 and H3K9me3) were gradually removed from these regions (Extended Data Fig. 6a-  
257 c). Moreover, the positively correlated CREs were clustered in regions enriched with active histone  
258 modifications and deficient in repressive histone modifications, implying a high-dimensional  
259 regulatory structure of ZGA CREs (Extended Data Fig. 6d-e). Furthermore, we investigated which  
260 TFs might be responsible for the establishment of ZGA-associated CREs. Notably, both positively  
261 correlated promoter CREs and distal CREs were highly enriched with *Arnt*, *Bcl6*, *Klf5*, *Nkx3-2*,  
262 *Nr5a2*, *Rara*, *Rarg*, *Pitx1*, and *Thrb* motifs; however, the negatively correlated CREs showed no  
263 enrichment with TFs in either promoter or distal regions (Fig. 4e). Considering the global decreases  
264 in Acc during the ZGA process and the characteristics of the negatively correlated CREs described  
265 above, these negative correlations seemed to simply reflect global changes in Acc rather than  
266 representing repressive regulation during ZGA. We next calculated TF activity (see Methods) in  
267 each individual cell (Fig. 4f). Notably, we found that *Klf4*, *Nkx3-2*, *Nr5a2* and *Rarg* showed high  
268 TF activity and high expression levels in 2-cell embryos compared to zygotes (Fig. 4g). More  
269 importantly, the TF activity of *Rarg*, *Nr5a2* and *Klf4* was strongly positively correlated with the  
270 expression levels of these genes, further supporting their potential roles in regulating ZGA-  
271 associated CREs (Fig. 4h-i). It is worth noting that among these three TFs, *Klf4* already showed  
272 high expression levels and high TF activity at the zygote stage, while both *Rarg* and *Nr5a2* showed  
273 almost no TF activity at the zygote stage, implying that *Klf4*, as a maternal factor, might contribute  
274 to initiating the ZGA process as early as the zygote stage (Fig. 4f and i).

### 275 **Mutually exclusive regulome confers ICM/TE lineage segregation**

276 Along with gradual increases in heterogeneity among blastomeres in preimplantation embryos,  
277 establishment of cell lineage-specific transcription regulatory networks occurred beginning in

278 unified totipotent zygotes that generated ICM and TE cells to enable further embryo development.  
279 To reveal the potential active CREs during this process, we determined the correlations between the  
280 Acc of each promoter/distal NDR and the Expr of its corresponding ICM/TE-specific expressed  
281 genes (specifically expressed in ICM: 766 genes, TE: 930 genes; Supplementary Table 4) across  
282 single cells during preimplantation development (Fig. 5a-b). The NDRs significantly correlated with  
283 ICM- or TE-specific expressed genes were termed ICM.CREs (positive: 497 in promoters, 4086 in  
284 distal regions; negative: 210 in promoters, 1559 in distal regions) or TE.CREs (positive: 774 in  
285 promoters, 5109 in distal regions; negative: 424 in promoters, 3445 in distal regions), respectively  
286 (Fig. 5a-b; Supplementary Table 5). Consistent with the ZGA-associated CREs, the positively  
287 correlated ICM/TE CREs also showed strong enrichment for active histone markers and depletion  
288 of repressive histone markers (Extended Data Fig. 7a-b). Notably, all of the known enhancers for  
289 three key ICM/TE TFs (*Pou5f1*, *Nanog*, and *Cdx2*) that we analyzed were revealed to be present in  
290 preimplantation embryos or in embryonic stem cells, confirming that the CREs identified by our  
291 correlation analysis could cover known active enhancers (Fig. 5c-d, Extended Data Fig. 7c-f)<sup>32-34</sup>.  
292 Specifically, we found three positively correlated CREs (#2, #3, and #4) corresponding to three  
293 known enhancers of *Pou5f1*; importantly, CRE #4 showed the highest positive correlation  
294 coefficient in our analysis, consistent with previous findings that the known enhancer corresponding  
295 to CRE #4 is the dominant enhancer regulating *Pou5f1* expression during preimplantation  
296 development (Fig. 5c-d)<sup>32</sup>. Thus, these results validate the accuracy of our analysis.

297 To explore how ICM/TE-associated regulatory networks are regulated in early embryos, we  
298 comprehensively analyzed different epigenetic molecular layers in these CREs. First, we calculated  
299 the correlations between Met and Expr for each CRE-gene pair. Interestingly, we observed mainly  
300 negatively correlated Met vs Expr CRE-gene pairs (27 positive vs 324 negative pairs in promoters;  
301 1119 positive vs 4194 negative pairs in distal regions) for the positively correlated Acc/Expr CREs,  
302 while we observed mainly positively correlated Met vs Expr CRE-gene pairs (105 positive vs 15  
303 negative pairs in promoters; 1504 positive vs 388 negative pairs in distal regions) for the negatively  
304 correlated Acc/Expr CREs (Fig. 5e). These results not only reveal the complex interplay between  
305 Met and Acc in regulating ICM/TE lineage-associated regulatory networks during preimplantation  
306 development but also confirm our speculation that the CREs with Acc/Expr positive and negative

307 correlations might be bound by activators and repressors, respectively. Regardless, the Met levels  
308 of both ICM.CREs and TE.CREs were lower in TE cells than in ICM cells, reflecting the more  
309 extensive erasure of genome-wide Met in TE cells (Fig. 5f). Next, we measured the dynamics of  
310 different molecular layers in these CREs during preimplantation development. Clearly, Acc and  
311 active histone modifications (H3K4me3 and H3K27ac) gradually increased in both positively and  
312 negatively correlated Acc/Expr CREs beginning at the 2-cell stage, while repressive epigenetic  
313 modifications (Met, H3K9me3 and H3K27me3) were already depleted in zygotes and remained  
314 depleted throughout preimplantation development in these regions, suggesting an overall priming  
315 of the epigenetic environment during ICM/TE lineage differentiation (Extended Data Fig. 8a-f).  
316 Interestingly, we also noticed that ICM.CREs were activated earlier than TE.CREs, as we observed  
317 clearly higher levels of active epigenetic modifications in ICM.CREs than in TE.CREs at the 2-cell  
318 stage (Extended Data Fig. 8a, b, e and 9a-b). Subsequently, TE.CREs were quickly activated and  
319 showed higher levels of active epigenetic modifications than ICM.CREs at the 8-cell stage,  
320 suggesting a stepwise activation of ICM.CREs and TE.CREs during preimplantation development  
321 (Extended Data Fig. 8a, b, e and 9a-b).

322 Finally, we investigated which TFs might be responsible for the establishment of differential  
323 regulatory networks in ICM and TE lineages. Notably, we found that the commonly enriched TFs  
324 in positively correlated ICM/TE CREs were ZGA drivers that showed high TF activity as early as  
325 the 2-cell embryo stage, such as *Nr5a2*, *Rarg*, *Rara*, *Bcl6*, etc., indicating that the earliest initiation  
326 of both ICM and TE programs occurs during the ZGA process (Fig. 5g and Extended Data Fig. 9c).  
327 In addition, three TFs, *Crx*, *Arnt* and *Pitx1*, were more enriched in ICM.CREs, while *Ctcf*,  
328 *Klf3/4/6/9/10*, *Gata1/2/4/6*, *Tead1/2/3/4*, *Sfp1*, *Tcfap2a* and *Sp1/2* were more enriched in TE.CREs  
329 (Fig. 5g). Interestingly, we observed that TE lineage-specific TFs, such as *Tcfap2a* and *Gata* family  
330 TFs, were enriched in the negatively correlated ICM.CREs, suggesting their repressive roles in  
331 regulating the ICM program (Fig. 5g). Moreover, most TE.CRE-specifically enriched TFs showed  
332 higher activity and expression levels in TE cells than in ICM cells, while ICM.CRE-associated TFs  
333 showed higher expression levels in ICM cells than in TE cells (Fig. 5h-i and Extended Data Fig.  
334 9c). Together, these results suggest that a mutually exclusive regulatory network is adopted to  
335 gradually establish and stabilize the different ICM and TE lineage fates, especially for the TE

336 lineage; specific drivers of this lineage establish a TE program while repressing the ICM program,  
337 forcing the TE lineage to separate from the ICM lineage.

## 338 **Discussion**

339 In conclusion, we have developed a single-cell multiomics sequencing technology, scNOMeRe-seq,  
340 that can be used to profile transcriptomes, DNA methylomes and Acc in parallel in the same  
341 individual cell with high accuracy, sensitivity and genome coverage. Taking advantage of this  
342 powerful tool, we have also characterized multiple molecular layers of mouse preimplantation  
343 embryos at single-cell resolution and have explored the associations between different epigenome  
344 layers and transcriptional output, providing new insights to enhance functional understanding of  
345 epigenetic reprogramming during mouse preimplantation development. Specifically, our results  
346 reveal that PG blastomeres show delayed development and abnormal DNA methylomes, in contrast  
347 to aneuploid blastomeres. The changes in Acc not only reflect the dynamic regulatory landscape but  
348 also may be substantially derived from asynchronous cell cycles of blastomeres that are irrelevant  
349 with transcriptional regulation, highlighting the importance of functional interpretations of  
350 epigenetic reprogramming at single-cell resolution. Using the DNA methylomes of all the individual  
351 cells within individual embryos, we reconstructed genetic lineages from zygotes to 8-cell embryos  
352 and revealed that asymmetric cleavage might be the major driver of the gradual increases in  
353 transcriptome heterogeneity among blastomeres that occur during the first three cleavages. Despite  
354 global demethylation in early embryos, allele-specific Met patterns inherited from oocytes and  
355 sperm are maintained throughout preimplantation development. The associations between Acc/Met  
356 and Expr at promoter regions in single cells are consistent with the findings from bulk samples;  
357 however, the positive correlations between Met and Expr at gene body regions are largely inherited  
358 from maternal genomes and are absent in the paternal genomes of early embryos. The Acc of  
359 parental memory-related regions appears to be substantially erased during the ZGA process and  
360 reconfigured in concert with the influences of histone modifications, Met, repeats, TFs, and possible  
361 high-dimensional chromatin structures to ensure proper activation of the zygotic genome. The  
362 overall-primed ICM/TE lineage-associated CREs are partially activated as early as the 2-cell  
363 embryo stage and are asynchronously activated in the following preimplantation stages. Intriguingly,

364 TE lineage-specific TFs seem to play dual roles in activating the TE program and repressing the  
365 ICM program, thereby segregating the TE fate from the ICM fate. Taken together, our findings not  
366 only provide new insights into the functional regulatory landscape in preimplantation development  
367 but also elucidate the fundamental mechanisms of epigenetic regulation.

368

369 **Methods**

370 Methods and any associated references are available in the supplemental sections.

371 **Acknowledgements**

372 This work was supported by the grants from National Key Research and Development Program  
373 (2018YFC1004000, 2018YFC1004101 and 2017YFA0105001), National Natural Science  
374 Foundation of China (31571544, 81730038, 81521002 and 31701261) and the Fundamental  
375 Research Funds for the Central Universities-Peking University Clinical Scientist Program. Y.W. was  
376 supported by Postdoctoral Fellowship of Peking-Tsinghua Center for Life Science and the grant  
377 from China Postdoctoral Science Foundation (2016M600873).

378 **Author contributions**

379 Y.W. conceived the method. L.Y. and J.Q. conceived the project. Y.W. and P.Y. performed  
380 experiments with the help of M.Y., Y.H., Y.N., X.Z. Y.W., Z.Y., and Y.P. performed computational  
381 analysis. Y.W., P.Y. and Z.Y. wrote the manuscript with feedback from all authors.

382 **Competing financial interests**

383 The authors declare no competing financial interests.

384



385 **References**

- 386 1 Burton, A. & Torres-Padilla, M. E. Chromatin dynamics in the regulation of cell fate  
387 allocation during early embryogenesis. *Nat Rev Mol Cell Biol* **15**, 723-734,  
388 doi:10.1038/nrm3885 (2014).
- 389 2 Zernicka-Goetz, M., Morris, S. A. & Bruce, A. W. Making a firm decision: multifaceted  
390 regulation of cell fate in the early mouse embryo. *Nat Rev Genet* **10**, 467-477,  
391 doi:10.1038/nrg2564 (2009).
- 392 3 Wang, Y., Liu, Q., Tang, F., Yan, L. & Qiao, J. Epigenetic Regulation and Risk Factors During  
393 the Development of Human Gametes and Early Embryos. *Annu Rev Genomics Hum Genet*  
394 **20**, 21-40, doi:10.1146/annurev-genom-083118-015143 (2019).
- 395 4 Guo, F. *et al.* Single-cell multi-omics sequencing of mouse early embryos and embryonic  
396 stem cells. *Cell Res* **27**, 967-988, doi:10.1038/cr.2017.82 (2017).
- 397 5 Zhu, P. *et al.* Single-cell DNA methylome sequencing of human preimplantation embryos.  
398 *Nat Genet* **50**, 12-19, doi:10.1038/s41588-017-0007-6 (2018).
- 399 6 Wu, J. *et al.* The landscape of accessible chromatin in mammalian preimplantation  
400 embryos. *Nature* **534**, 652-657, doi:10.1038/nature18606 (2016).
- 401 7 Zhang, B. *et al.* Allelic reprogramming of the histone modification H3K4me3 in early  
402 mammalian development. *Nature* **537**, 553-557, doi:10.1038/nature19361 (2016).
- 403 8 Liu, X. *et al.* Distinct features of H3K4me3 and H3K27me3 chromatin domains in pre-  
404 implantation embryos. *Nature* **537**, 558-562, doi:10.1038/nature19362 (2016).
- 405 9 Dahl, J. A. *et al.* Broad histone H3K4me3 domains in mouse oocytes modulate maternal-  
406 to-zygotic transition. *Nature* **537**, 548-552, doi:10.1038/nature19360 (2016).
- 407 10 Lu, F. *et al.* Establishing Chromatin Regulatory Landscape during Mouse Preimplantation  
408 Development. *Cell* **165**, 1375-1388, doi:10.1016/j.cell.2016.05.050 (2016).
- 409 11 Xia, W. *et al.* Resetting histone modifications during human parental-to-zygotic transition.  
410 *Science* **365**, 353-360, doi:10.1126/science.aaw5118 (2019).
- 411 12 Guo, H. *et al.* The DNA methylation landscape of human early embryos. *Nature* **511**, 606-  
412 610, doi:10.1038/nature13544 (2014).
- 413 13 Wang, C. *et al.* Reprogramming of H3K9me3-dependent heterochromatin during  
414 mammalian embryo development. *Nature cell biology* **20**, 620-631, doi:10.1038/s41556-  
415 018-0093-4 (2018).
- 416 14 Li, L. *et al.* Single-cell multi-omics sequencing of human early embryos. *Nature cell*  
417 *biology* **20**, 847-858, doi:10.1038/s41556-018-0123-2 (2018).
- 418 15 Thurman, R. E. *et al.* The accessible chromatin landscape of the human genome. *Nature*  
419 **489**, 75-82, doi:10.1038/nature11232 (2012).
- 420 16 Klemm, S. L., Shipony, Z. & Greenleaf, W. J. Chromatin accessibility and the regulatory  
421 epigenome. *Nat Rev Genet* **20**, 207-220, doi:10.1038/s41576-018-0089-8 (2019).
- 422 17 Wu, J. *et al.* Chromatin analysis in human early development reveals epigenetic transition  
423 during ZGA. *Nature* **557**, 256-260, doi:10.1038/s41586-018-0080-8 (2018).
- 424 18 Gao, L. *et al.* Chromatin Accessibility Landscape in Human Early Embryos and Its  
425 Association with Evolution. *Cell* **173**, 248-259 e215, doi:10.1016/j.cell.2018.02.028 (2018).
- 426 19 Buenrostro, J. D. *et al.* Single-cell chromatin accessibility reveals principles of regulatory  
427 variation. *Nature* **523**, 486-490, doi:10.1038/nature14590 (2015).

- 428 20 Chen, X., Miragaia, R. J., Natarajan, K. N. & Teichmann, S. A. A rapid and robust method  
429 for single cell chromatin accessibility profiling. *Nat Commun* **9**, 5345, doi:10.1038/s41467-  
430 018-07771-0 (2018).
- 431 21 Buenrostro, J. D. *et al.* Integrated Single-Cell Analysis Maps the Continuous Regulatory  
432 Landscape of Human Hematopoietic Differentiation. *Cell* **173**, 1535-1548 e1516,  
433 doi:10.1016/j.cell.2018.03.074 (2018).
- 434 22 Hou, Y. *et al.* Single-cell triple omics sequencing reveals genetic, epigenetic, and  
435 transcriptomic heterogeneity in hepatocellular carcinomas. *Cell Res* **26**, 304-319,  
436 doi:10.1038/cr.2016.23 (2016).
- 437 23 Clark, S. J. *et al.* scNMT-seq enables joint profiling of chromatin accessibility DNA  
438 methylation and transcription in single cells. *Nat Commun* **9**, 781, doi:10.1038/s41467-  
439 018-03149-4 (2018).
- 440 24 Cao, J. *et al.* Joint profiling of chromatin accessibility and gene expression in thousands of  
441 single cells. *Science* **361**, 1380-1385, doi:10.1126/science.aau0730 (2018).
- 442 25 Bian, S. *et al.* Single-cell multiomics sequencing and analyses of human colorectal cancer.  
443 *Science* **362**, 1060-1063, doi:10.1126/science.aao3791 (2018).
- 444 26 Liu, L. *et al.* Deconvolution of single-cell multi-omics layers reveals regulatory  
445 heterogeneity. *Nat Commun* **10**, 470, doi:10.1038/s41467-018-08205-7 (2019).
- 446 27 Pott, S. Simultaneous measurement of chromatin accessibility, DNA methylation, and  
447 nucleosome phasing in single cells. *Elife* **6**, doi:10.7554/eLife.23203 (2017).
- 448 28 Sheng, K., Cao, W., Niu, Y., Deng, Q. & Zong, C. Effective detection of variation in single-  
449 cell transcriptomes using MATQ-seq. *Nature methods* **14**, 267-270,  
450 doi:10.1038/nmeth.4145 (2017).
- 451 29 Deng, Q., Ramskold, D., Reinius, B. & Sandberg, R. Single-cell RNA-seq reveals dynamic,  
452 random monoallelic gene expression in mammalian cells. *Science* **343**, 193-196,  
453 doi:10.1126/science.1245316 (2014).
- 454 30 Luo, H. *et al.* Cell identity bookmarking through heterogeneous chromatin landscape  
455 maintenance during the cell cycle. *Hum Mol Genet* **26**, 4231-4243,  
456 doi:10.1093/hmg/ddx312 (2017).
- 457 31 Xie, W. *et al.* Base-resolution analyses of sequence and parent-of-origin dependent DNA  
458 methylation in the mouse genome. *Cell* **148**, 816-831, doi:10.1016/j.cell.2011.12.035  
459 (2012).
- 460 32 Yeom, Y. I. *et al.* Germline regulatory element of Oct-4 specific for the totipotent cycle of  
461 embryonal cells. *Development* **122**, 881-894 (1996).
- 462 33 Blinka, S., Reimer, M. H., Jr., Pulakanti, K. & Rao, S. Super-Enhancers at the Nanog Locus  
463 Differentially Regulate Neighboring Pluripotency-Associated Genes. *Cell Rep* **17**, 19-28,  
464 doi:10.1016/j.celrep.2016.09.002 (2016).
- 465 34 Rayon, T. *et al.* Notch and hippo converge on Cdx2 to specify the trophectoderm lineage  
466 in the mouse blastocyst. *Developmental cell* **30**, 410-422,  
467 doi:10.1016/j.devcel.2014.06.019 (2014).
- 468

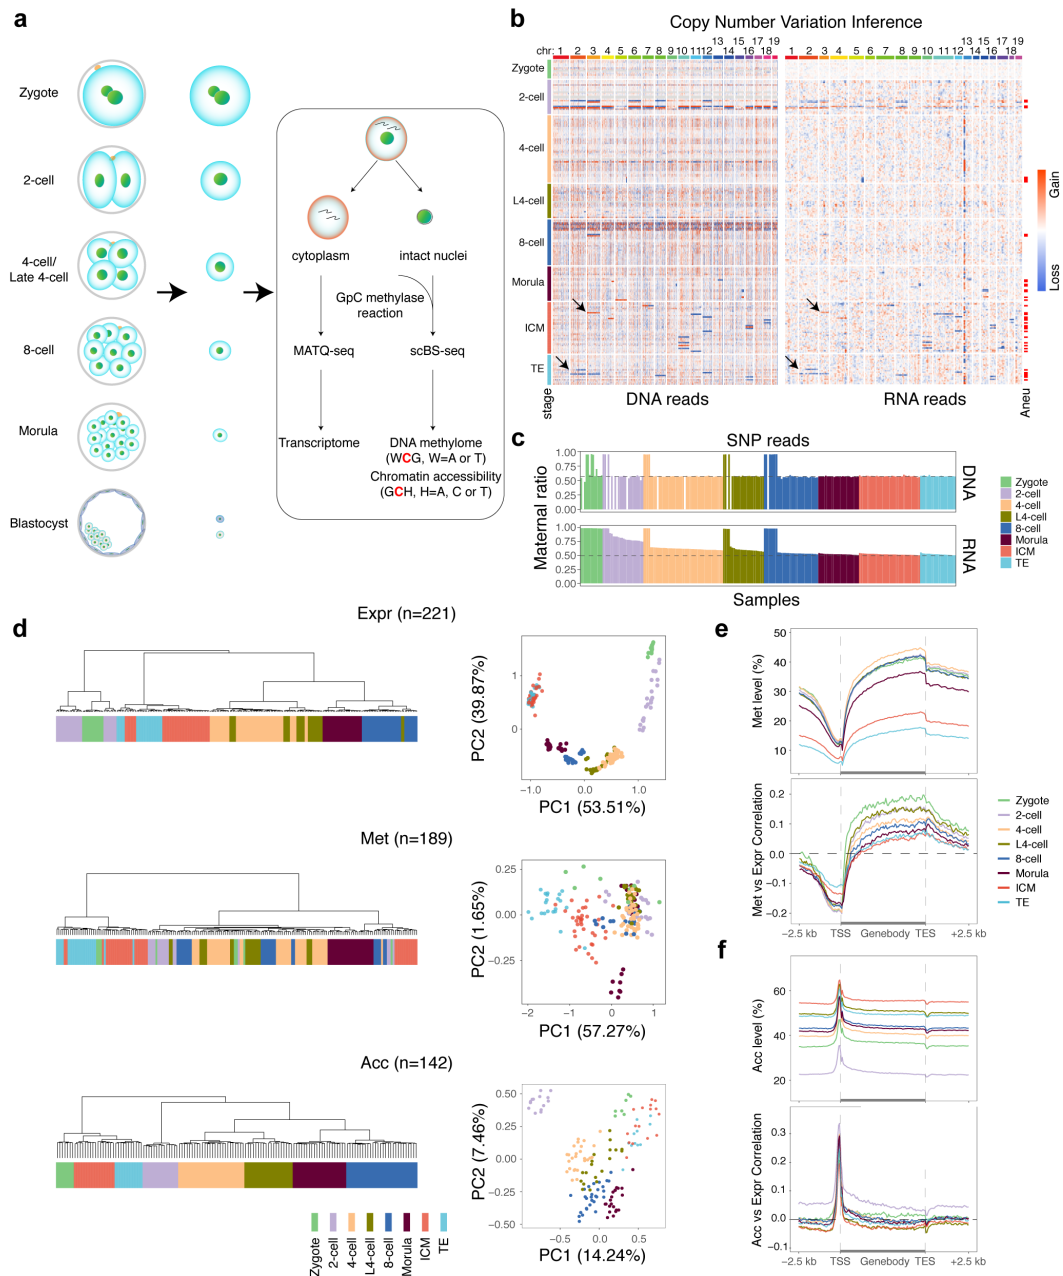

**Figure 1 scNOMeRe-seq profiles in mouse preimplantation embryos.**

(a) Schematic illustration of scNOMeRe-seq, including key steps, methods of library preparation and mouse preimplantation stages analyzed in this work outlined in the text.

(b) Heat map showing copy number variations (CNV) inferred by DNA reads (left) and gene expression level (right, normalized each gene by average closest 100 genes) in mouse preimplantation blastomeres. Arrows indicate the examples of matched CNV inferences from DNA and RNA reads.

(c) Bar plot showing the ratios of SNP tracked maternal DNA (top) or RNA (bottom) reads in total SNP tracked parental reads in each individual cell across preimplantation development.

(d) Unsupervised clustering (left) and principle component analysis (right) of preimplantation blastomeres using gene expression level (top), DNA methylation level of 5 kilobases (kb) tiles (middle) and chromatin accessibility of all stage merged NDRs (bottom). n, the cell numbers of each dataset.

(e) Profiles showing DNA methylation level (top), the weighted Pearson correlation coefficients of DNA methylation level vs gene expression level (bottom) along the gene bodies and 2.5 kb upstream of the transcription start sites (TSS) and 2.5 kb downstream of the transcription end sites (TES) of all genes for each stage. Met, WCG methylation; Expr, RNA expression.

(f) Profiles showing chromatin accessibility (top), the weighted Pearson correlation coefficients of chromatin accessibility vs gene expression level (bottom), along the gene bodies and 2.5 kb upstream of the TSS and 2.5 kb downstream of the TES of all genes for each stage. Acc, GCH methylation.

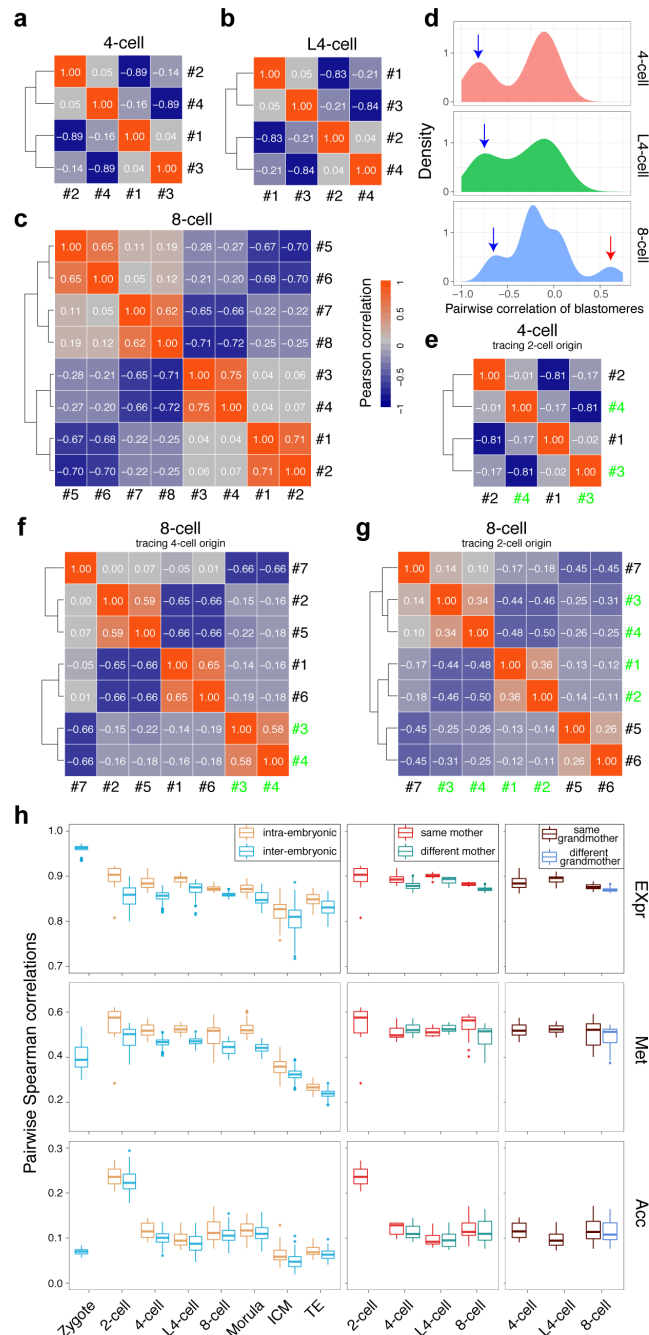

**Figure 2 Reconstruction of genetic lineages reveals the source of heterogeneity in early embryos.**

(a-c) Heat map showing the Pearson correlation coefficients in representative 4-cell embryo (a), late 4-cell embryo (b), and 8-cell embryo (c), using z-score normalized DNA methylation level of 1 millionbases (Mb) bins in individual blastomere from the same embryo. The numbers in white color showing the Pearson correlation coefficients.

(d) Distribution of the pairwise Pearson correlation coefficients for DNA methylation level of 1 Mb bins in individual blastomere from the same 4-cell embryo (top), late 4-cell embryo (middle) and 8-cell embryo (bottom). Blue arrows indicate the pairs of blastomeres from the same 2-cell blastomere, and the red arrow indicates the pairs of blastomeres from the same 4-cell blastomere.

**(e)** Heat map showing the Pearson correlation coefficients in a 4-cell embryo. #3-4 (green labeled) cells divided from the same 2-cell blastomere validated by injection with FITC-dye. The numbers in white color showing the Pearson correlation coefficients.

**(f)** Heat map showing the Pearson correlation coefficients in an 8-cell embryo. #3-4 (green labeled) cells divided from the same 4-cell blastomere validated by injection with FITC-dye. The numbers in white color showing the Pearson correlation coefficients.

**(g)** Heat map showing the Pearson correlation coefficients in an 8-cell embryo. #1-4 (green labeled) cells divided from the same 2-cell blastomere validated by injection with FITC-dye. The numbers in white color showing the Pearson correlation coefficients.

**(h)** Box plot showing the pairwise Spearman correlation coefficients of RNA expression level (top), DNA methylation level of 5 kb bins (middle) and chromatin accessibility of NDRs (bottom) at indicated stages. intra-embryonic, within the same embryo; inter-embryonic, in different embryos of the same stage; same mother, the blastomeres origin from a same mother blastomere; same grandmother, the blastomeres origin from a same grandmother blastomere.

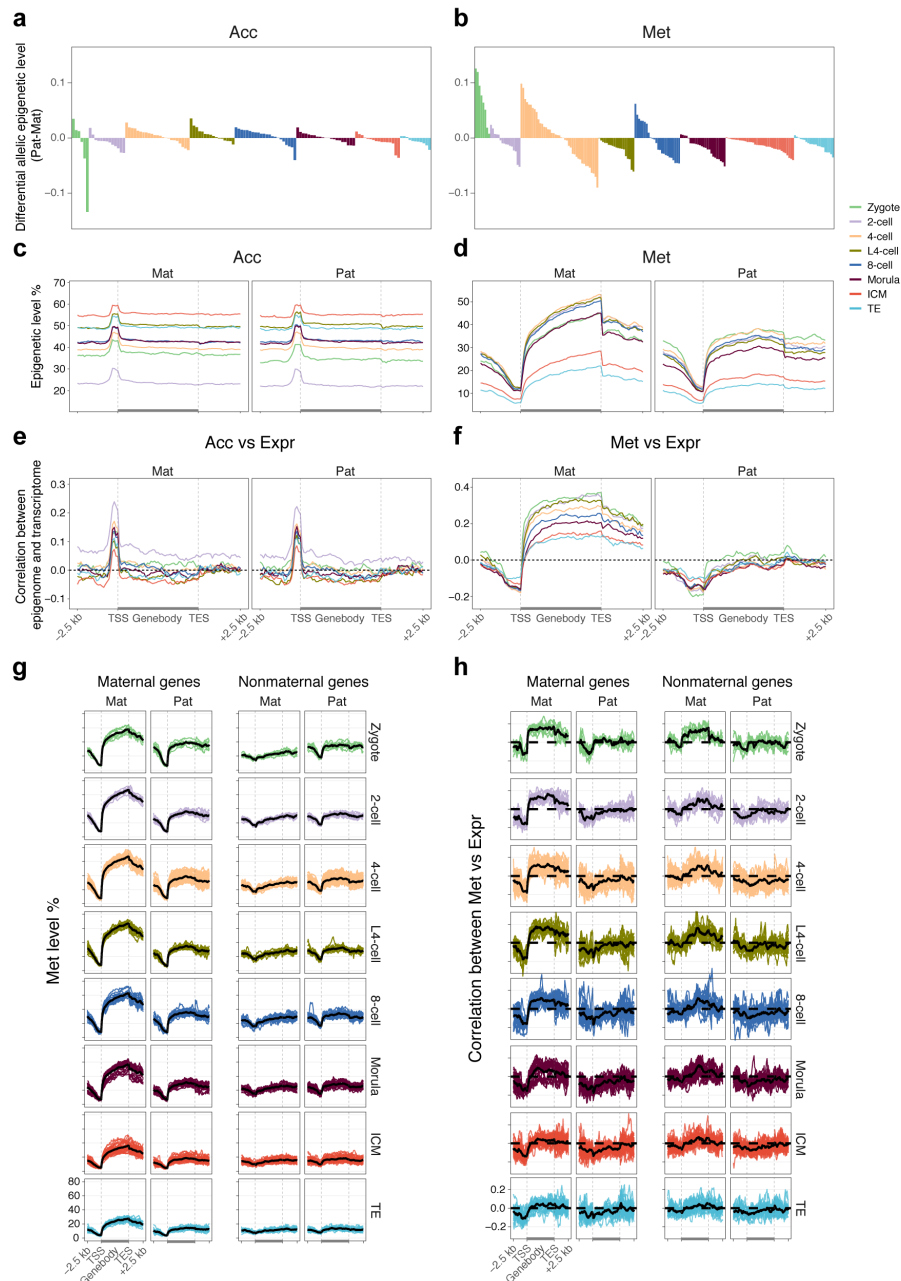

**Figure 3 Allele-specific regulation of gene expression in early embryos.**

(a-b) Bar plot showing differences of global chromatin accessibility (a) and DNA methylation level (b) between paternal and maternal genomes in each individual cell of preimplantation embryos.

(c-d) Allelic chromatin accessibility (c) and DNA methylation level (d) around genic regions of each stage. Mat, maternal allele; Pat, paternal allele.

(e) The Pearson correlations between chromatin accessibility around genic regions of maternal allele or paternal allele vs gene expression level of each stage.

(f) The Pearson correlations between DNA methylation level around genic regions of maternal allele or paternal allele vs gene expression level of each stage.

(g) Allelic DNA methylation level around genic regions of maternal (TPM  $\geq 1$  in zygote stage) and nonmaternal genes in each stage.

(h) The Pearson correlations between DNA methylation level around genic regions of maternal allele or paternal allele vs expression level of maternal and nonmaternal genes.



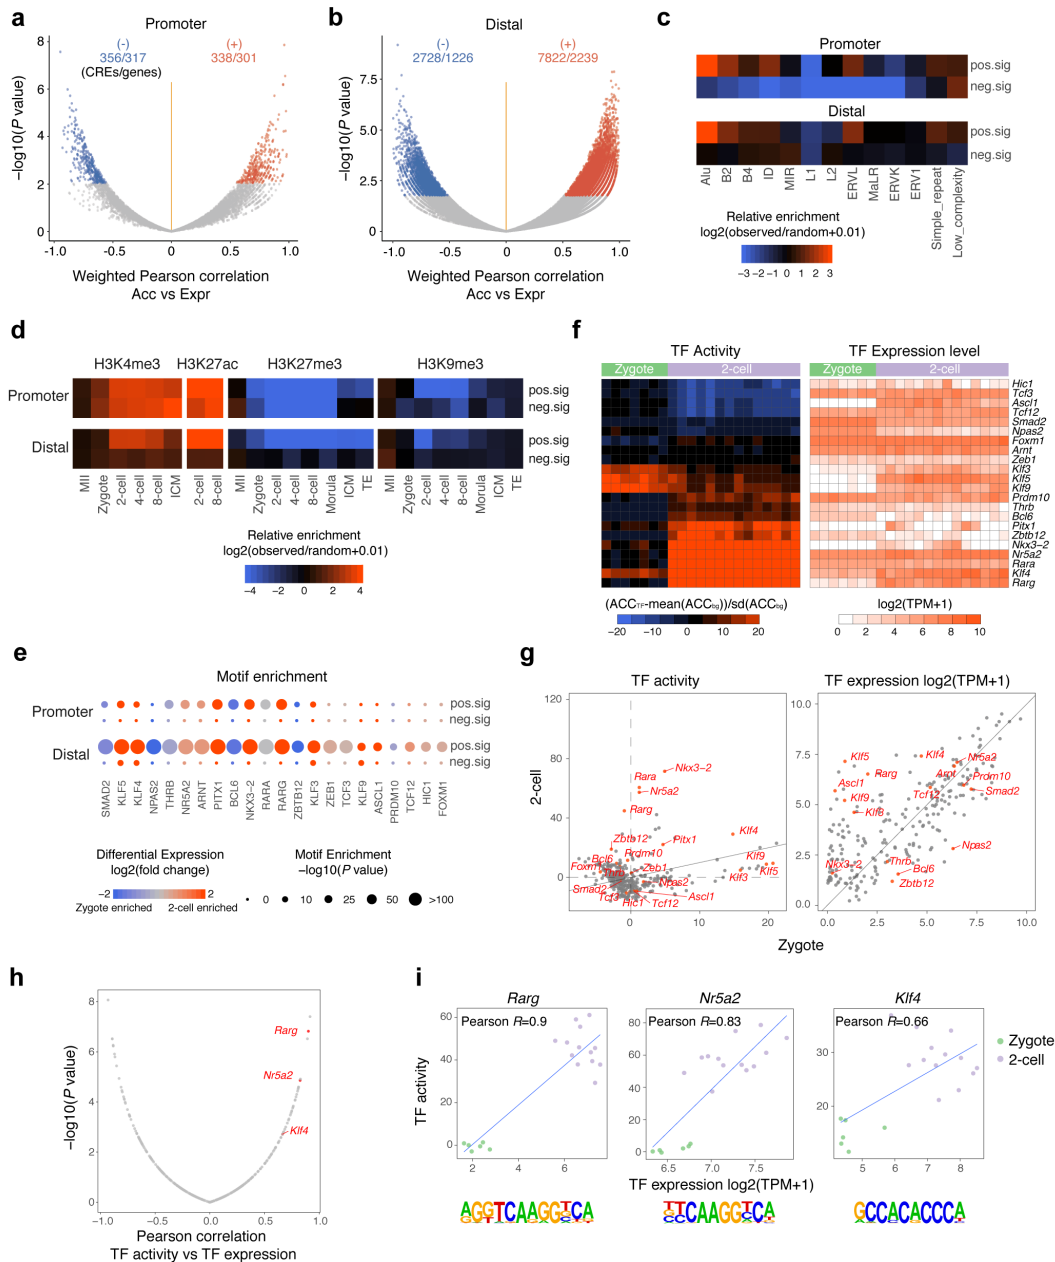

**Figure 4 scNOMeRe-seq reveals a ZGA associated regulome.**

(a-b) Volcano plot showing the weighted Pearson correlations between chromatin accessibility of promoter-NDRs (a) / distal-NDRs (b) and the expression level of corresponding ZGA genes across cells from zygote to 2-cell stage. Significant associations (FDR < 0.1) are in red (positive) and blue (negative). The number of CREs (CRE, the NDR that was significantly correlated with ZGA gene) and unduplicated genes are labeled.

(c) Heat map showing the enrichment of ZGA associated CREs in repeats. The enrichment was calculated as log<sub>2</sub> ratio for the numbers of observed CREs that overlap with repeats divided by the numbers of random regions that overlap with repeats.

(d) Heat map showing the enrichment of ZGA associated CREs in histone modifications of early embryos from available published data (ref. 7-9). The enrichment was calculated as log<sub>2</sub> ratio for the number of observed CREs that overlap with histone modification peaks divided by the number of random regions that overlap with histone modification peaks.



(e) TF motifs identified from ZGA associated CREs. Only TFs with the  $P$  value  $< 1 \times 10^{-10}$  and TPM  $\geq 5$  at least at one stage were included. The color of point represents the differential gene expression level between 2-cell stage and zygote. The size of point represents the significance of motif enrichment.

(f) Heat map showing the TF activity (left) and expression level (right) of ZGA enriched TFs in each individual cell of zygote and 2-cell embryos.

(g) Scatter plot showing the difference of TF activity (left) and expression level (right) between zygote and 2-cell stage. The genes labeled in red indicate the TFs showing significantly differential activity (left, FDR  $< 0.1$ ) or expression level (right, FDR  $< 0.01$ ).

(h) Volcano plot showing the Pearson correlations between TF activity and expression level across cells from zygote to 2-cell stage. Significantly correlated (FDR  $< 0.1$ ) TFs that enriched in ZGA associated CREs and showed higher TF activities and expression level in 2-cell embryos are labeled.

(i) Scatter plot showing TF activity and expression level of *Rarg*, *Nr5a2* and *Klf4* in each single cell of zygote and 2-cell embryos. The corresponding enriched DNA-binding motifs are shown at the bottom of each TF.

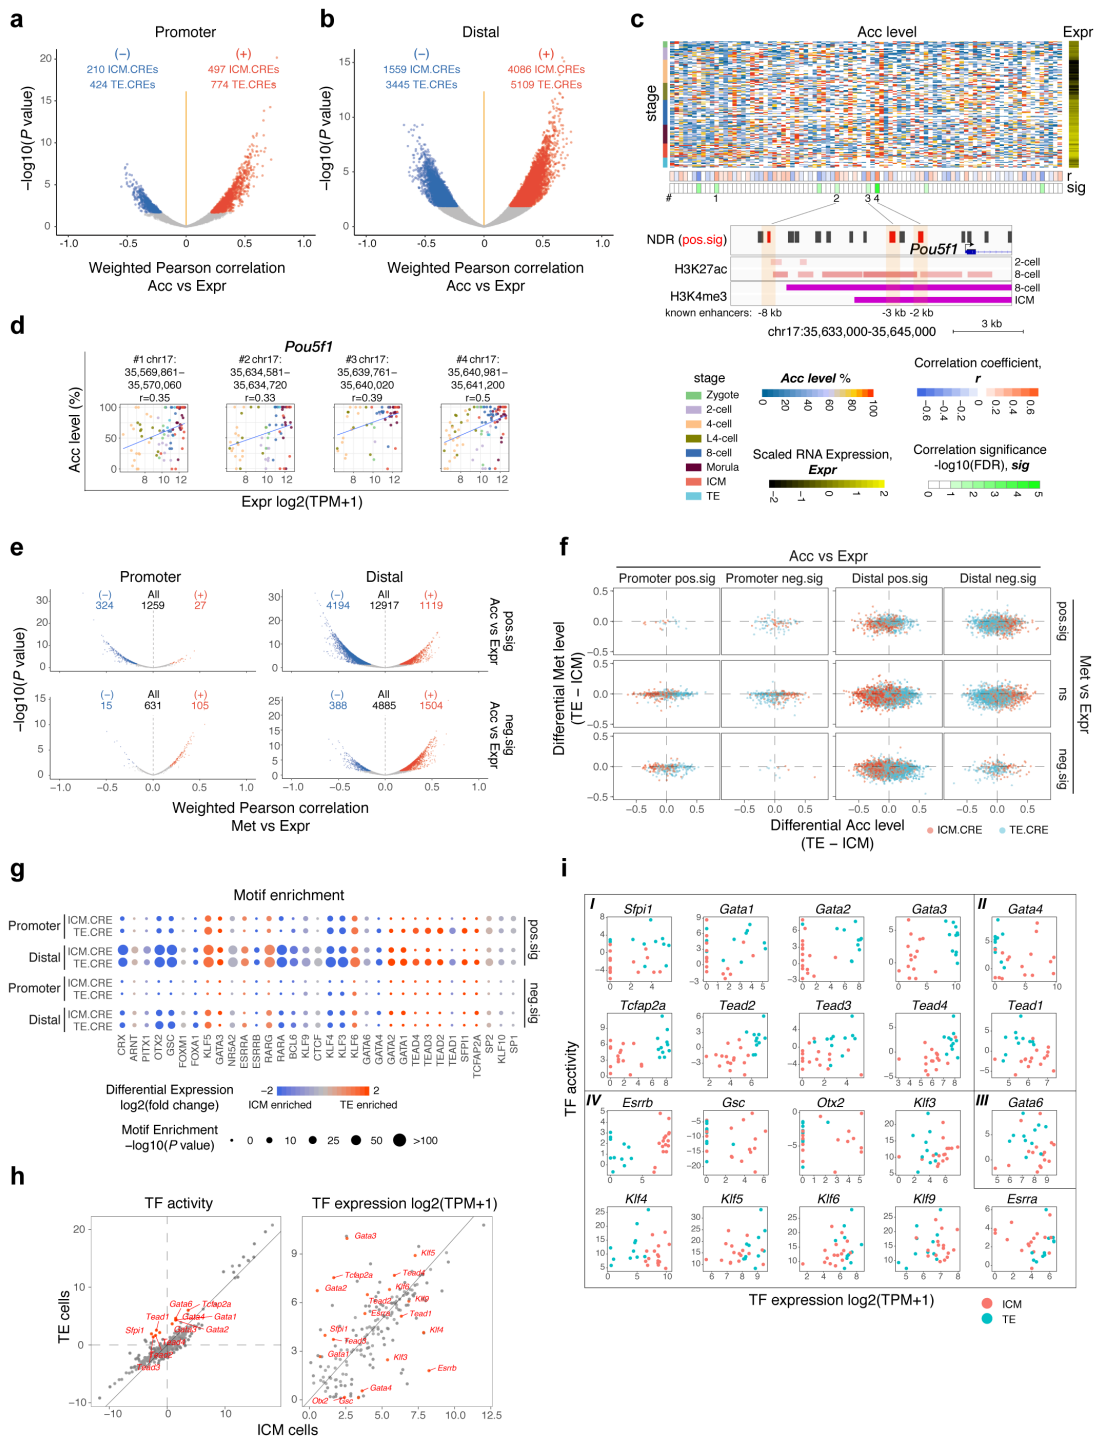

**Figure 5 Mutually exclusive regulome confers ICM/TE lineage segregation.**

(a-b) Volcano plot showing the weighted Pearson correlations between chromatin accessibility of NDRs at promoter (a) / distal (b) regions and the expression level of corresponding ICM/TE specific expressed genes across preimplantation development. Significant associations (FDR < 0.1) are in red (positive) and blue (negative). ICM.CRE, the NDR that was significantly correlated with ICM-specific-expressed gene; TE.CRE, the NDR that was significantly correlated with TE-specific-expressed gene. The number of CREs are labeled.

(c) (top) Heat map showing chromatin accessibility (Acc level) of *Pou5f1* gene locus surrounding NDRs (from TSS upstream 100 kb to TES downstream 100 kb), and expression level (Expr, scaled

$\log_2(\text{TPM}+1)$  of *Pou5f1* in each individual cell of early embryos; the weighted Pearson correlation coefficients ( $r$ ) and significance ( $\text{sig}$ ) are shown. #, the labels of positive-correlated CREs. (bottom) IGV snapshot showing the distribution of *Pou5f1* surrounding NDRs (positive-correlated CREs are in red), H3K27ac and H3K4me3 peaks. Three known enhancers of *Pou5f1* are shaded.

(d) Scatter plot showing the expression level of *Pou5f1* and chromatin accessibility of positive-correlated CREs which have been labeled in (c). The genomic coordinates of CREs and the correlation coefficients are shown.

(e) Volcano plot showing the weighted Pearson correlation between DNA methylation level and gene expression level of positive-correlated (top) and negative-correlated (bottom) CREs.

(f) Scatter plot showing the differential chromatin accessibility and DNA methylation level of ICM.CREs and TE.CREs between ICM and TE cells at promoter (left) and distal (right) regions. Positive value indicates a higher epigenetic level in TE cells, negative value indicates a higher epigenetic level in ICM cells.

(g) TF motifs identified from ICM.CREs and TE.CREs. Only TFs with the  $P$  value  $< 1 \times 10^{-10}$  and  $\text{TPM} \geq 5$  at least at one stage were included. The color of points represents the differential gene expression level between ICM and TE. The size of point represents the significance of motif enrichment.

(h) Scatter plot showing the difference of TF activity (left) and expression level (right) between ICM and TE. The genes labeled in red indicate the TFs showing significantly differential activity (left,  $\text{FDR} < 0.1$ ) or expression level (right,  $\text{FDR} < 0.01$ ) between ICM and TE.

(i) Scatter plot showing the TF activity and expression level in each individual cell of ICM and TE. I, the TFs showing higher activity and expression level in TE cells; II, the TFs showing higher activity in TE cells but showing higher expression level in ICM cells; III, the TF showing higher activity in TE cells but showing no difference in gene expression level; IV, the TFs showing no difference in activity but showing higher expression level in ICM cells.
